# Supplementary material for: The Study of pH Effects on Phase Transition of Multi-Stimuli Responsive P(NiPAAm-co-AAc) Hydrogel Using 2D-COS
Source: MDPI journal article supplement (doi:10.3390/polym13091447), 2021-04-29
Supplement: s1 [file s1]

# The study of pH effects on phase transition of multi-stimuli responsive P(NiPAAm-co-AAc) hydrogel using 2D-COS

Yeonju Park <sup>1</sup>, Minkyung Kim <sup>2</sup>, Hae Jin Chung <sup>2</sup>, Ah Hyun Woo <sup>2</sup>, Isao Noda <sup>3</sup> and Young Mee Jung <sup>1,2,\*</sup>

<sup>1</sup> Kangwon Radiation Convergence Research Support Center, Kangwon National University, Chuncheon 24341, Korea; [yeonju4453@kangwon.ac.kr](mailto:yeonju4453@kangwon.ac.kr) (Y.P.), [ymjung@kangwon.ac.kr](mailto:ymjung@kangwon.ac.kr) (Y.M.J.)

<sup>2</sup> Department of Chemistry, Institute for Molecular Science and Fusion Technology, Kangwon National University, Chuncheon 24341, Korea; [alsrud9351@naver.com](mailto:alsrud9351@naver.com) (M.K.), [jhyejin1212@gmail.com](mailto:jhyejin1212@gmail.com) (H.J.C.), [dndkgus99@naver.com](mailto:dndkgus99@naver.com) (A.H.W.), [ymjung@kangwon.ac.kr](mailto:ymjung@kangwon.ac.kr) (Y.M.J.)

<sup>3</sup> Department of Materials Science and Engineering, University of Delaware, Newark, DE 19716, USA; [noda@udel.edu](mailto:noda@udel.edu) (I.N.)

\* Correspondence: [ymjung@kangwon.ac.kr](mailto:ymjung@kangwon.ac.kr); Tel.: +82-33-250-8495

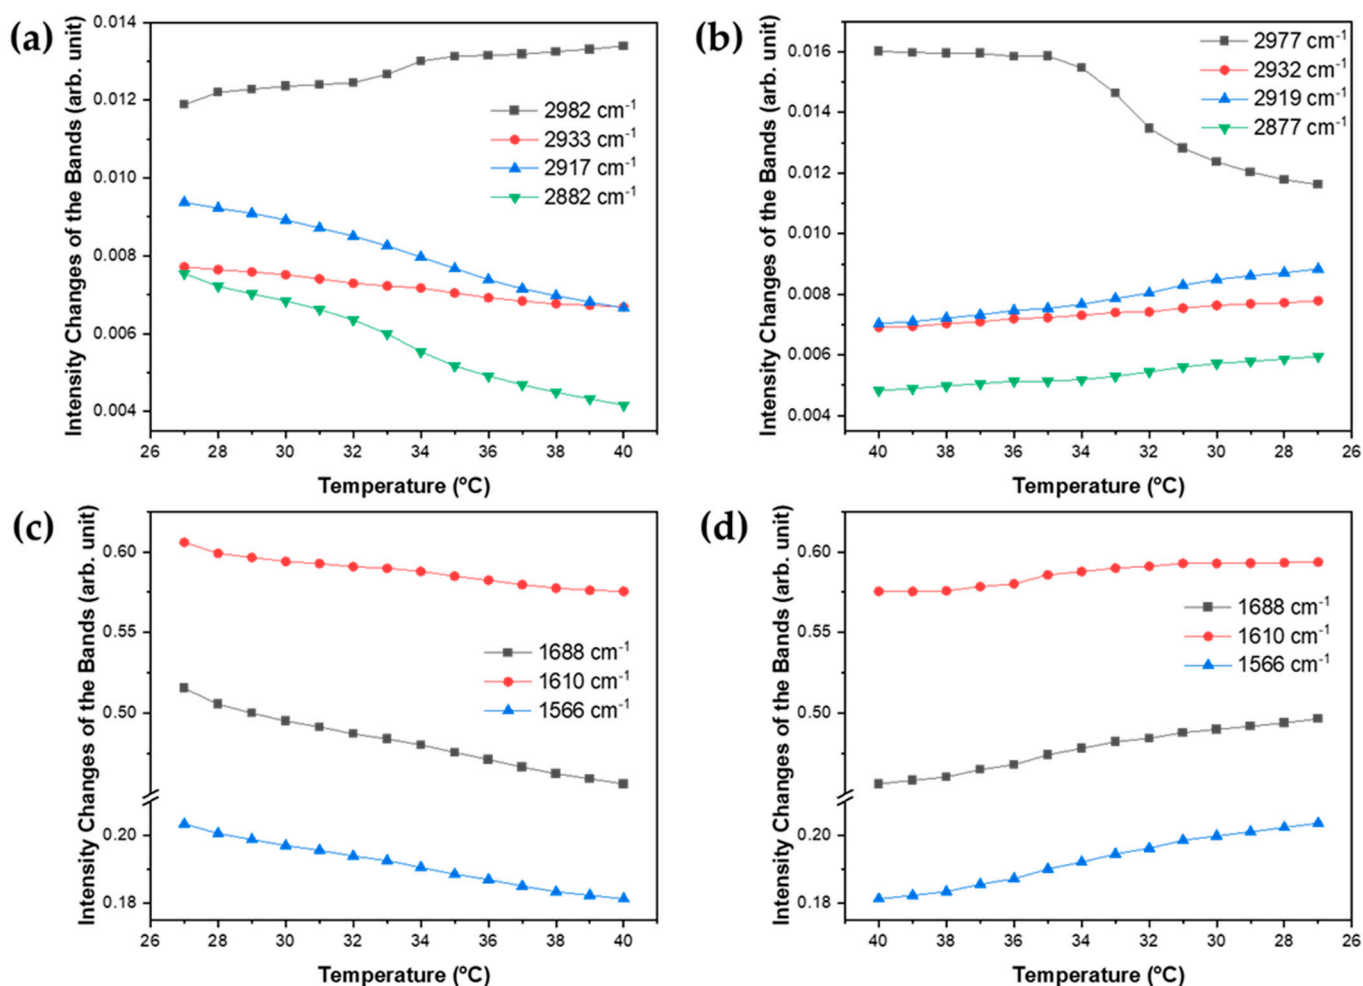

**Figure S1.** Intensity changes of the bands in two spectral regions (a,b: 3010-2850 and c,d: 1800-1480 cm<sup>-1</sup>) of P(NiPAAm-co-AAc) hydrogel at pH4 during the heating (a, c) and cooling (b, d) processes.

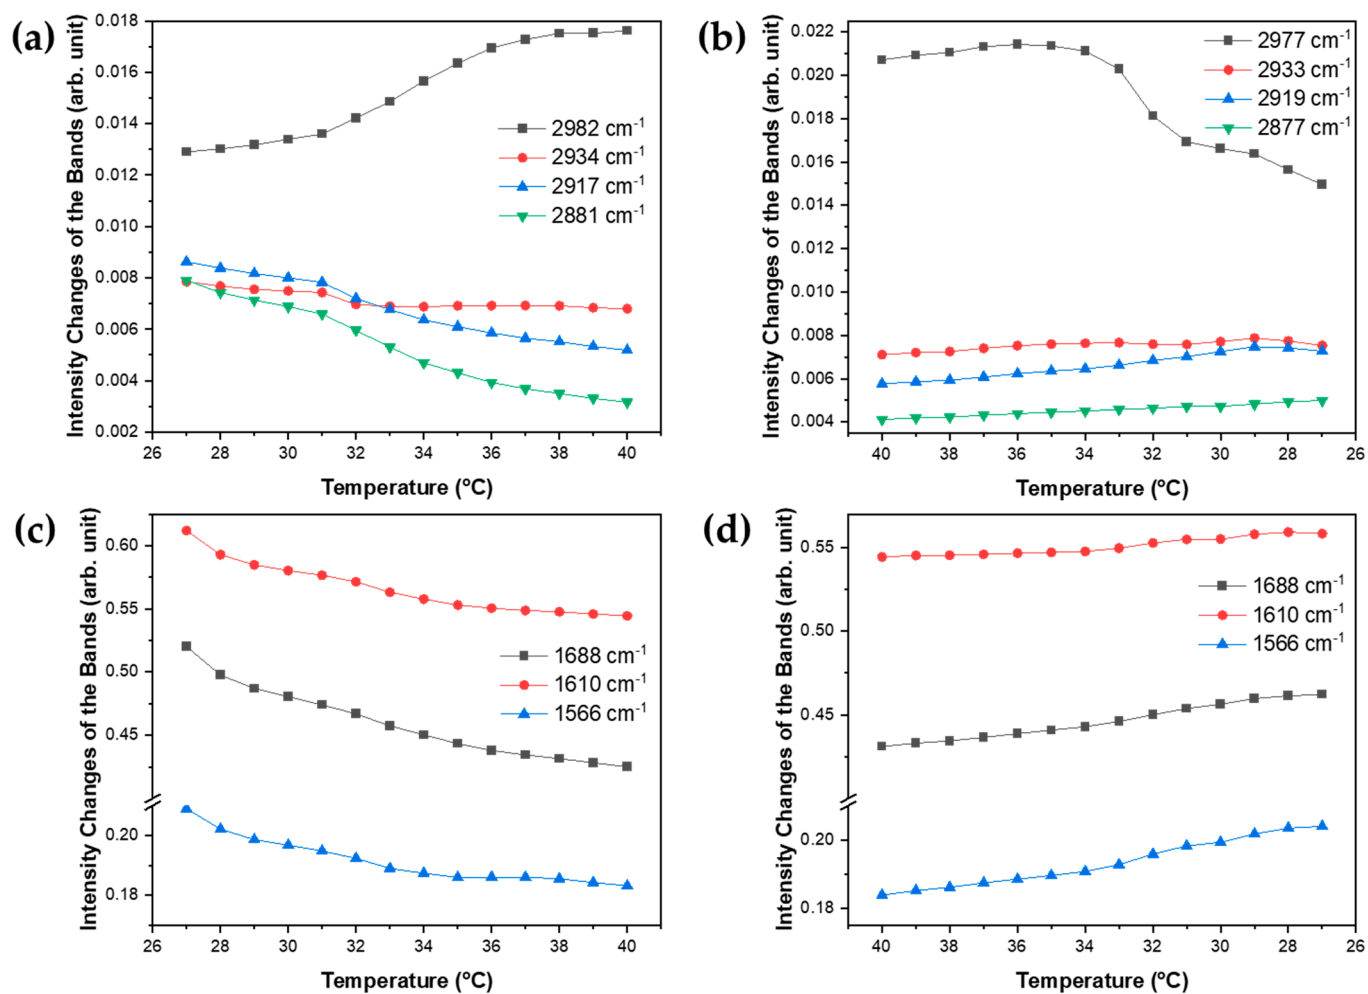

**Figure S2.** Intensity changes of the bands in two spectral regions (a,b: 3010-2850 and c,d: 1800-1480 cm<sup>-1</sup>) of P(NPAAm-co-AAc) hydrogel at pH3 during the heating (a, c) and cooling (b, d) processes.

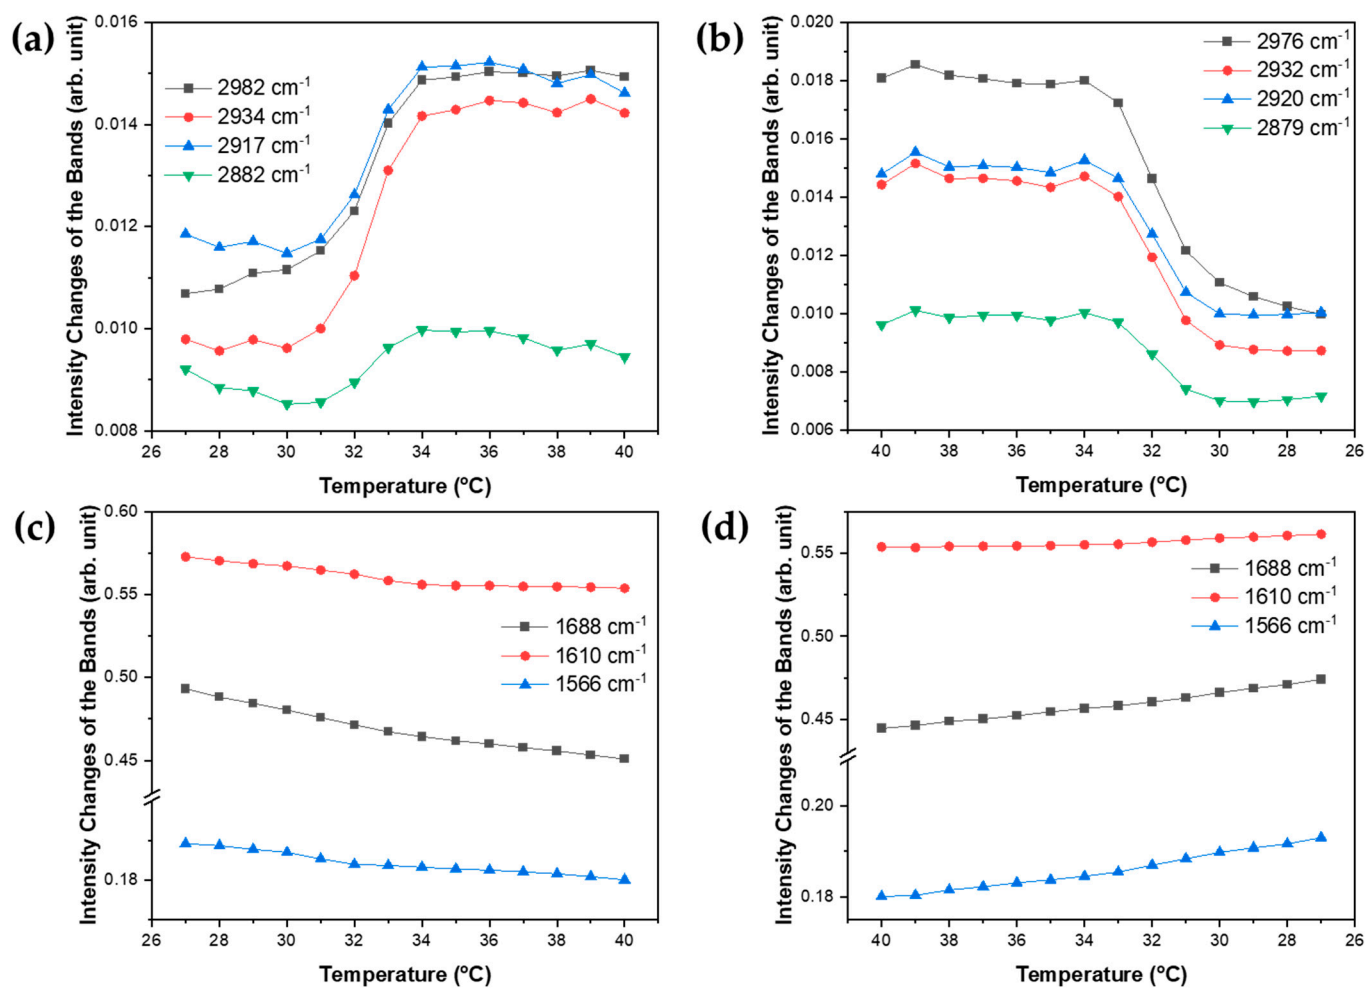

**Figure S3.** Intensity changes of the bands in two spectral regions (a,b: 3010-2850 and c,d: 1800-1480  $\text{cm}^{-1}$ ) of P(NPAAm-co-AAc) hydrogel at pH2 during the heating (a, c) and cooling (b, d) processes.

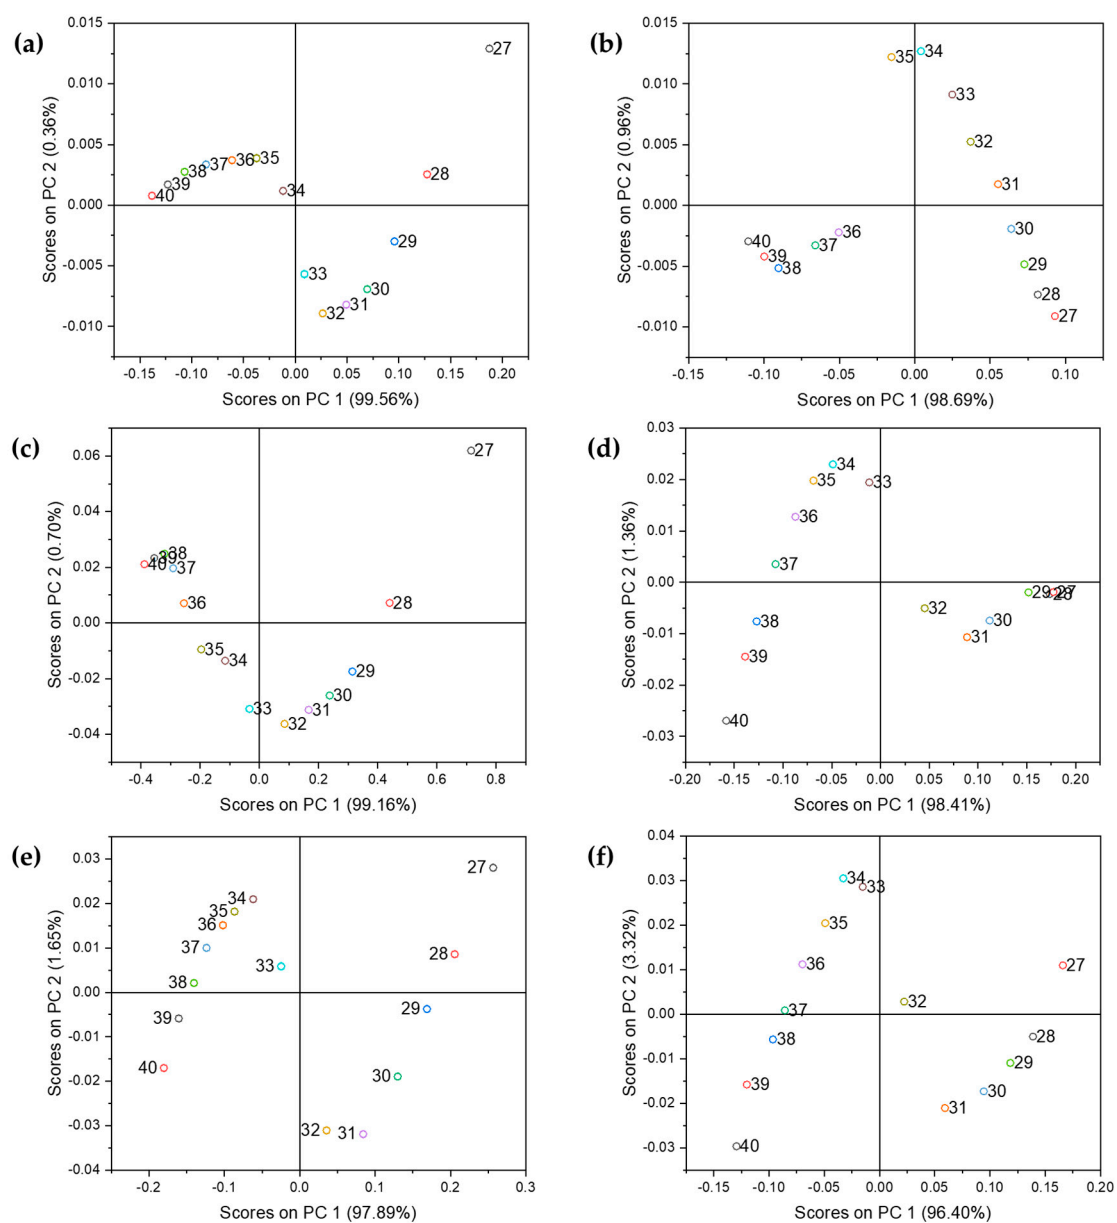

**Figure S4.** Score plots of the first two PCs of P(NiPAAm-co-AAc) hydrogel at pH4 (a,b), 3 (c,d), and 2 (e,f) during the heating (a,c,e) and cooling (b,d,f) processes.
